# Supplementary material for: Quality-of-Life Outcomes, Effectiveness and Tolerability of Apremilast in Patients with Plaque Psoriasis and Routine German Dermatology Care: Results from LAPIS-PSO
Source: PubMed Central journal article supplement — Dermatol Ther (Heidelb). 2021 Dec 15;12(1):203–21. doi: 10.1007/s13555-021-00658-x (PMC8776950; doi:10.1007/s13555-021-00658-x), 2021-12-15
Supplement: 13555_2021_658_MOESM1_ESM.pdf [file 13555_2021_658_MOESM1_ESM.pdf]

## Supplementary Material

### **Title: Quality-of-Life Outcomes, Effectiveness, and Tolerability of Apremilast in Patients With Plaque Psoriasis and Routine German Dermatology Care: Results From LAPIS-PSO**

Kristian Reich<sup>1</sup>; Bernhard Korge<sup>2</sup>; Nina Magnolo<sup>3</sup>; Maria Manasterski<sup>4</sup>; Uwe Schwichtenberg<sup>5</sup>; Petra Staubach-Renz<sup>6</sup>; Stephan Kaiser<sup>7</sup>; Josefine Roemmler-Zehrer<sup>7</sup>; Natalie Núñez Gómez<sup>8</sup>; Katrin Lorenz-Baath<sup>7</sup>

*<sup>1</sup>Translational Research in Inflammatory Skin Diseases, Institute for Health Services Research in Dermatology and Nursing, University Medical Center Hamburg-Eppendorf, Hamburg, Germany; <sup>2</sup>Hautarztpraxis Priv. Doz. Dr. med. Bernhard Korge, Düren, Germany; <sup>3</sup>Department of Dermatology, University Hospital Muenster, Münster, Germany; <sup>4</sup>Hautarztpraxis Manasterski und Dues, Berlin, Germany; <sup>5</sup>Derma Nord Hautarztpraxen Dr. med. Schwichtenberg, Bremen, Germany; <sup>6</sup>Department of Dermatology, University Medical Center, Mainz, Germany; <sup>7</sup>Amgen GmbH, München, Germany; <sup>8</sup>Bristol-Myers Squibb, Summit, NJ, USA*

**Supplementary Table 1. Baseline Demographics and Patient Characteristics in the Safety Analysis Population**

| Characteristic                      | Safety Analysis Population<br>N=364 |
|-------------------------------------|-------------------------------------|
| Female, %                           | 42.1                                |
| Age at inclusion, mean (SD), y      | 51.9 (13.3)                         |
| Duration of psoriasis, mean (SD), y | 20.2 (16.4)                         |
| BMI, mean (SD), kg/m <sup>2</sup>   | 28.5 (5.7)                          |
| Erythrodermic psoriasis, n (%)      | 6 (1.8)                             |
| Guttate psoriasis, n (%)            | 35 (10.3)                           |
| Inverse psoriasis, n (%)            | 54 (16.0)                           |
| ScPGA >0, n (%)                     | 286 (79.4)                          |
| Target NAPSI >0, <sup>a</sup> n (%) | 183 (50.7)                          |
| PPPGA >0, n (%)                     | 81 (23.0)                           |
| Pruritus, n (%)                     | 346 (97.5)                          |
| Comorbidities (>5%)                 |                                     |
| Cardiovascular disorders            | 147 (4.0)                           |
| Hypertension                        | 133 (36.5)                          |
| Coronary heart disease              | 25 (6.9)                            |
| Other                               | 16 (4.4)                            |
| Peripheral artery disease           | 5 (1.4)                             |
| Dyslipidaemia                       | 51 (14.0)                           |
| Diabetes mellitus                   | 32 (8.8)                            |
| Confirmed depression                | 28 (7.7)                            |
| Hepatic disorder                    | 23 (6.3)                            |
| Other                               | 114 (31.3)                          |

N represents the total sample; number of patients with data available may vary. Percentages represent data for patients with baseline values.

<sup>a</sup>NAPSI of the most involved nail.

BMI=body mass index; NAPSI=Nail Psoriasis Severity Index; PPPGA=Palmoplantar Psoriasis Physician's Global Assessment; ScPGA=Scalp Physician's Global Assessment; SD=standard deviation.

**Supplementary Table 2. DLQI and BSA Outcomes by Study Visit in the Full Analysis Population**

|                                        | <b>Baseline</b> | <b>Visit 1<br/>(~1 Month<br/>After BL)</b> | <b>Visit 2<br/>(~4 Months<br/>After BL)</b> | <b>Visit 3<br/>(~7 Months<br/>After BL)</b> | <b>Visit 4<br/>(~10 Months<br/>After BL)</b> | <b>Visit 5<br/>(~13 Months<br/>After BL)</b> |
|----------------------------------------|-----------------|--------------------------------------------|---------------------------------------------|---------------------------------------------|----------------------------------------------|----------------------------------------------|
| <b>LOCF</b>                            |                 |                                            |                                             |                                             |                                              |                                              |
| DLQI score, n                          | 257             | 257                                        | 257                                         | 257                                         | 257                                          | 257                                          |
| Mean (SD)                              | 14.1 (5.9)      | 9.0 (6.4)                                  | 7.1 (5.8)                                   | 6.5 (5.9)                                   | 6.6 (6.0)                                    | 6.6 (6.0)                                    |
| DLQI change from<br>baseline, n        | —               | 257                                        | 257                                         | 257                                         | 257                                          | 257                                          |
| Mean (SD)                              | —               | -5.1 (5.9)                                 | -7.0 (7.2)                                  | -7.6 (7.2)                                  | -7.5 (7.2)                                   | -7.5 (7.3)                                   |
| DLQI ≤5, n/N (%)                       | —               | 86/257 (33.5)                              | 120/257 (46.7)                              | 137/257 (53.3)                              | 137/257 (53.3)                               | 140/257 (54.5)                               |
| DLQI improvement ≥5<br>points, n/N (%) | —               | 124/257 (48.2)                             | 153/257 (59.5)                              | 168/257 (65.4)                              | 166/257 (64.6)                               | 172/257 (66.9)                               |
| BSA percentage, n                      | 255             | 255                                        | 255                                         | 255                                         | 255                                          | 255                                          |
| Mean (SD)                              | 21.8 (18.5)     | 17.6 (15.8)                                | 13.0 (14.0)                                 | 11.8 (14.5)                                 | 11.3 (13.2)                                  | 10.9 (13.0)                                  |

|                             |   |            |             |              |              |              |
|-----------------------------|---|------------|-------------|--------------|--------------|--------------|
| BSA change from baseline, n | — | 255        | 255         | 255          | 255          | 255          |
| Mean (SD)                   | — | -4.3 (9.2) | -8.8 (14.0) | -10.1 (14.0) | -10.5 (14.9) | -10.9 (15.1) |

---

**Data as observed**

|                                     |             |                |                |                |               |                |
|-------------------------------------|-------------|----------------|----------------|----------------|---------------|----------------|
| DLQI score, n                       | 257         | 222            | 220            | 169            | 135           | 128            |
| Mean (SD)                           | 14.1 (5.9)  | 8.2 (6.0)      | 6.7 (5.5)      | 5.2 (5.0)      | 4.9 (4.7)     | 4.7 (4.8)      |
| DLQI change from baseline, n        | —           | 222            | 220            | 169            | 135           | 128            |
| Mean (SD)                           | —           | -5.9 (6.0)     | -7.2 (7.3)     | -8.7 (7.1)     | -8.8 (6.9)    | -9.1 (7.0)     |
| DLQI ≤5, n/N (%)                    | —           | 86/222 (38.7)  | 105/220 (47.7) | 103/169 (60.9) | 86/135 (63.7) | 88/128 (68.8)  |
| DLQI improvement ≥5 points, n/N (%) | —           | 124/222 (55.9) | 135/220 (61.4) | 124/169 (73.4) | 98/135 (72.6) | 102/128 (79.7) |
| BSA percentage, n                   | 255         | 220            | 221            | 173            | 136           | 127            |
| Mean (SD)                           | 21.8 (18.5) | 17.7 (16.2)    | 12.0 (13.2)    | 9.3 (13.6)     | 6.9 (9.0)     | 6.3 (8.3)      |
| BSA change from baseline, n         | —           | 220            | 220            | 172            | 135           | 126            |
| Mean (SD)                           | —           | -4.9 (9.8)     | -9.7 (14.6)    | -12.2 (14.2)   | -13.8 (15.9)  | -14.9 (15.3)   |

---

BL=baseline; BSA=psoriasis-involved body surface area; DLQI=Dermatology Life Quality Index; LOCF=last observation carried forward; SD=standard deviation.

## Supplementary Figure 1. LAPIS-PSO Study Design

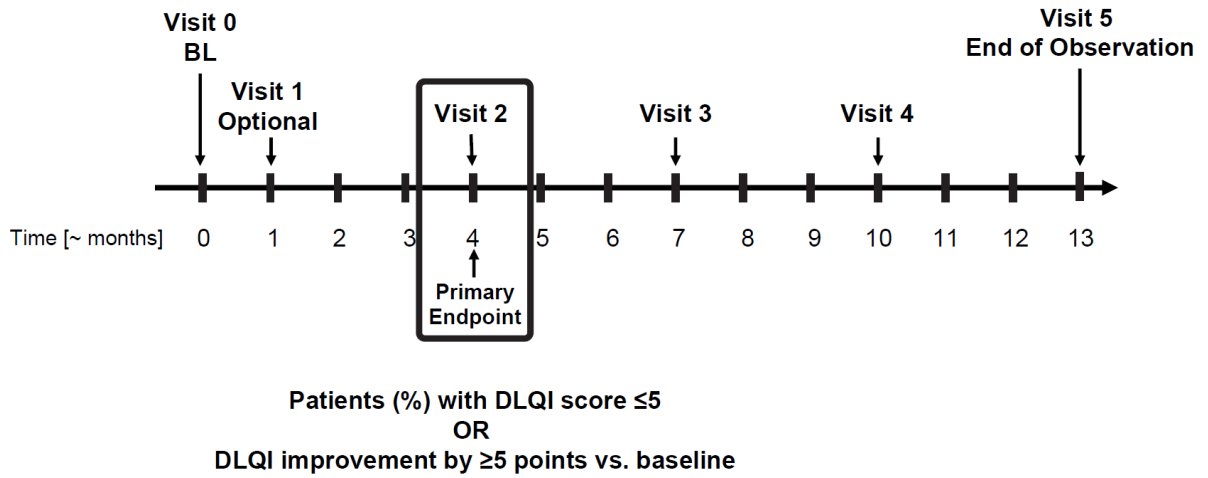

Study visits were timed according to physicians' clinical practice, and no strict study visit schedule was implemented. Visit 1 was optional.

BL=baseline; DLQI=Dermatology Life Quality Index.

## Supplementary Figure 2. Patient Populations

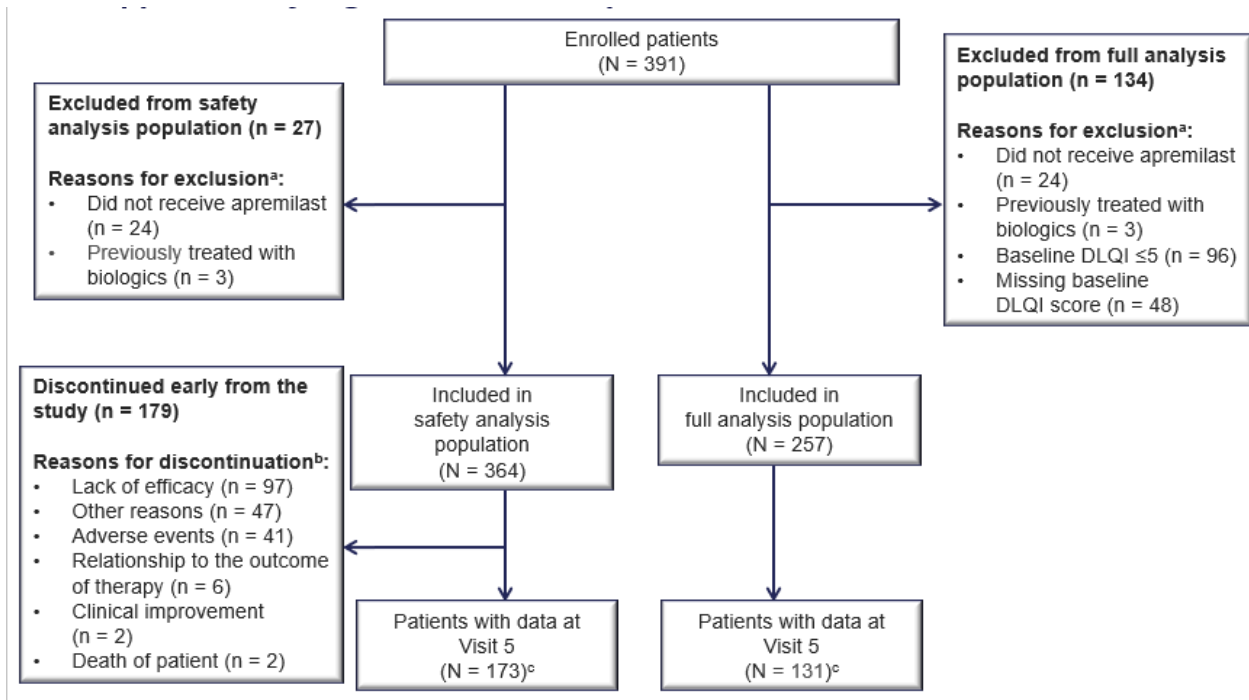

In the safety analysis population, 14 patients had missing documentation for Visit 5 or no documentation of early discontinuation. The safety analysis population consisted of all patients who received  $\geq 1$  dose of apremilast and fulfilled the inclusion criteria. The full analysis population was defined as all patients in the safety analysis population with DLQI score  $> 5$  at baseline who had DLQI data available at Visit 2. A patient was referred to as a dropout if he or she left the study prior to the planned completion. Dropouts were not replaced. All data available from the follow-up visits were analyzed and contributed to the study outcome.

<sup>a</sup>For some patients,  $> 1$  reason for exclusion was reported.

<sup>b</sup>For some patients,  $> 1$  reason for discontinuation was reported.

<sup>c</sup>Two patients had documented visit 5 data and early study dropout.

DLQI=Dermatology Life Quality Index.

**Supplementary Figure 3. Percentage of Patients Achieving DLQI Score Categories in the Full Analysis Population**

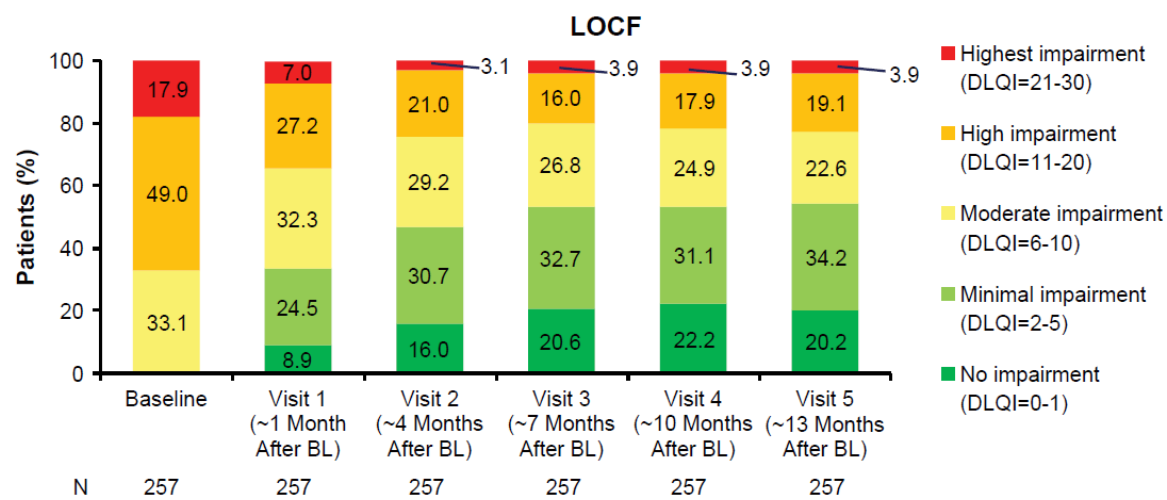

Data as observed

|                      | Baseline       | Visit 1       | Visit 2       | Visit 3       | Visit 4       | Visit 5       |
|----------------------|----------------|---------------|---------------|---------------|---------------|---------------|
| <b>DLQI, n/N (%)</b> |                |               |               |               |               |               |
| 0-1                  | 0/257 (0.0)    | 23/222 (10.4) | 38/220 (17.3) | 44/169 (26.0) | 42/135 (31.1) | 36/128 (28.1) |
| 2-5                  | 0/257 (0.0)    | 63/222 (28.4) | 67/220 (30.5) | 59/169 (34.9) | 44/135 (32.6) | 52/128 (40.6) |
| 6-10                 | 85/257 (33.1)  | 68/222 (30.6) | 65/220 (29.5) | 44/169 (26.0) | 32/135 (23.7) | 22/128 (17.2) |
| 11-20                | 126/257 (49.0) | 54/222 (24.3) | 46/220 (20.9) | 19/169 (11.2) | 16/135 (11.9) | 17/128 (13.3) |
| 21-30                | 46/257 (17.9)  | 14/222 (6.3)  | 4/220 (1.8)   | 3/169 (1.8)   | 1/135 (0.7)   | 1/128 (0.8)   |

Data are from the full analysis population (N=257). For the as observed analysis, n/N=number of patients who achieved response/number of patients with available data.

BL=baseline; DLQI=Dermatology Life Quality Index.

**Supplementary Figure 4. Mean (a) BSA Percentage and (b) PASI Over Time by Baseline PGA Severity Subgroup**

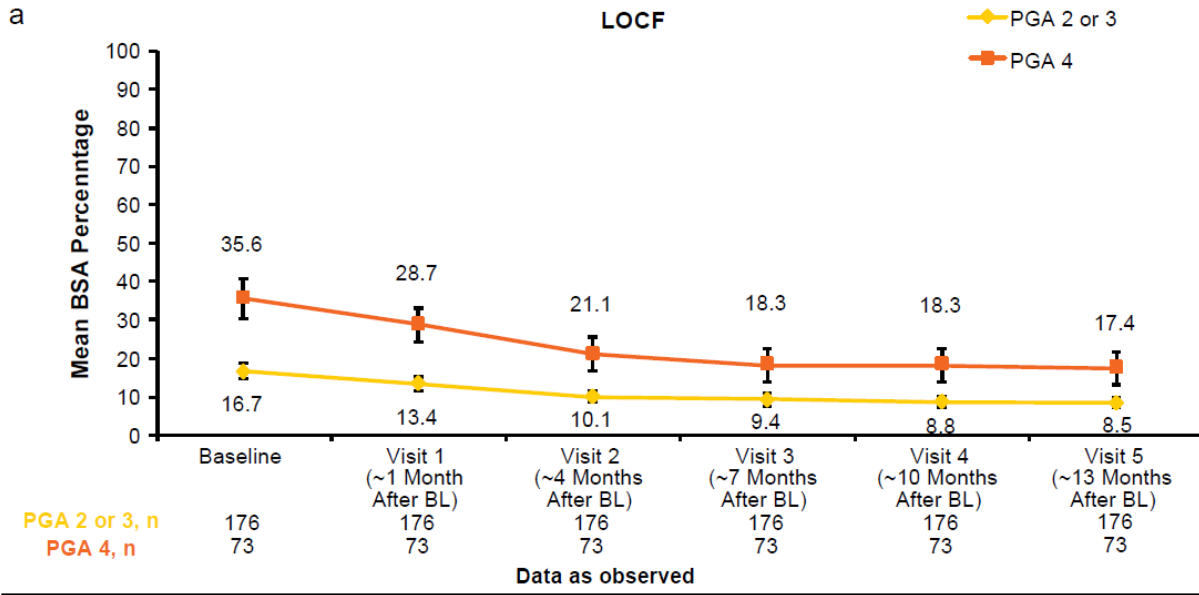

**Data as observed**

|                        | Baseline          | Visit 1           | Visit 2           | Visit 3          | Visit 4         | Visit 5         |
|------------------------|-------------------|-------------------|-------------------|------------------|-----------------|-----------------|
| BL PGA 2 or 3, n       | 176               | 149               | 152               | 119              | 96              | 88              |
| Mean BSA %<br>(95% CI) | 16.7 (14.7, 18.7) | 13.3 (11.4, 15.3) | 9.5 (7.9, 11.0)   | 7.8 (5.6, 10.0)  | 6.2 (4.5, 7.8)  | 5.7 (4.0, 7.4)  |
| BL PGA 4, n            | 73                | 67                | 64                | 50               | 36              | 36              |
| Mean BSA %<br>(95% CI) | 35.6 (30.4, 40.8) | 28.3 (23.6, 33.0) | 18.9 (14.4, 23.3) | 13.7 (9.1, 18.2) | 9.7 (6.0, 13.4) | 8.2 (5.1, 11.2) |



b

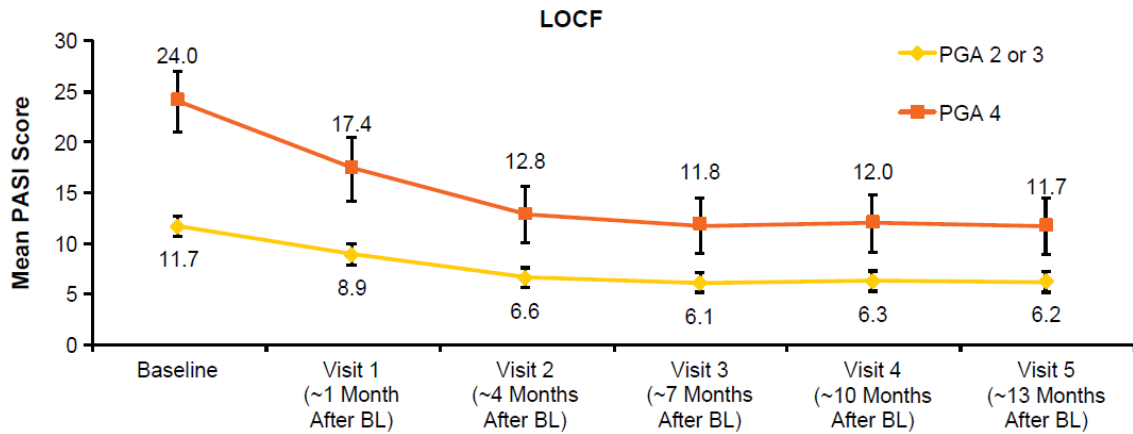

|                         | Baseline          | Visit 1           | Visit 2          | Visit 3         | Visit 4        | Visit 5        |
|-------------------------|-------------------|-------------------|------------------|-----------------|----------------|----------------|
| <b>PGA 2 or 3, n</b>    | 151               | 151               | 151              | 151             | 151            | 151            |
| <b>PGA 4, n</b>         | 65                | 65                | 65               | 65              | 65             | 65             |
| <b>Data as observed</b> |                   |                   |                  |                 |                |                |
|                         | <b>Baseline</b>   | <b>Visit 1</b>    | <b>Visit 2</b>   | <b>Visit 3</b>  | <b>Visit 4</b> | <b>Visit 5</b> |
| BL PGA 2 or 3, n        | 151               | 123               | 131              | 97              | 77             | 76             |
| Mean (95% CI)           | 11.7 (10.7, 12.7) | 8.2 (7.1, 9.3)    | 6.6 (5.5, 7.8)   | 4.7 (3.7, 5.7)  | 4.3 (3.3, 5.3) | 3.9 (2.9, 4.9) |
| BL PGA 4, n             | 65                | 52                | 49               | 38              | 28             | 29             |
| Mean (95% CI)           | 24.0 (21.0, 27.0) | 16.0 (12.4, 19.6) | 11.4 (8.4, 14.5) | 7.8 (4.9, 10.7) | 6.1 (3.1, 9.1) | 5.7 (3.1, 8.3) |

Data are from the full analysis population (N=257). For the as observed analysis, n=number of patients with available data. Error bars represent 95% CI.

BL=baseline; BSA=psoriasis-involved body surface area; CI=confidence interval;

PASI=Psoriasis Area and Severity Index; PGA=Physician's Global Assessment.

**Supplementary Figure 5. PPQ Responses at Visit 2 (~4 Months After Baseline) in the Full Analysis Population**

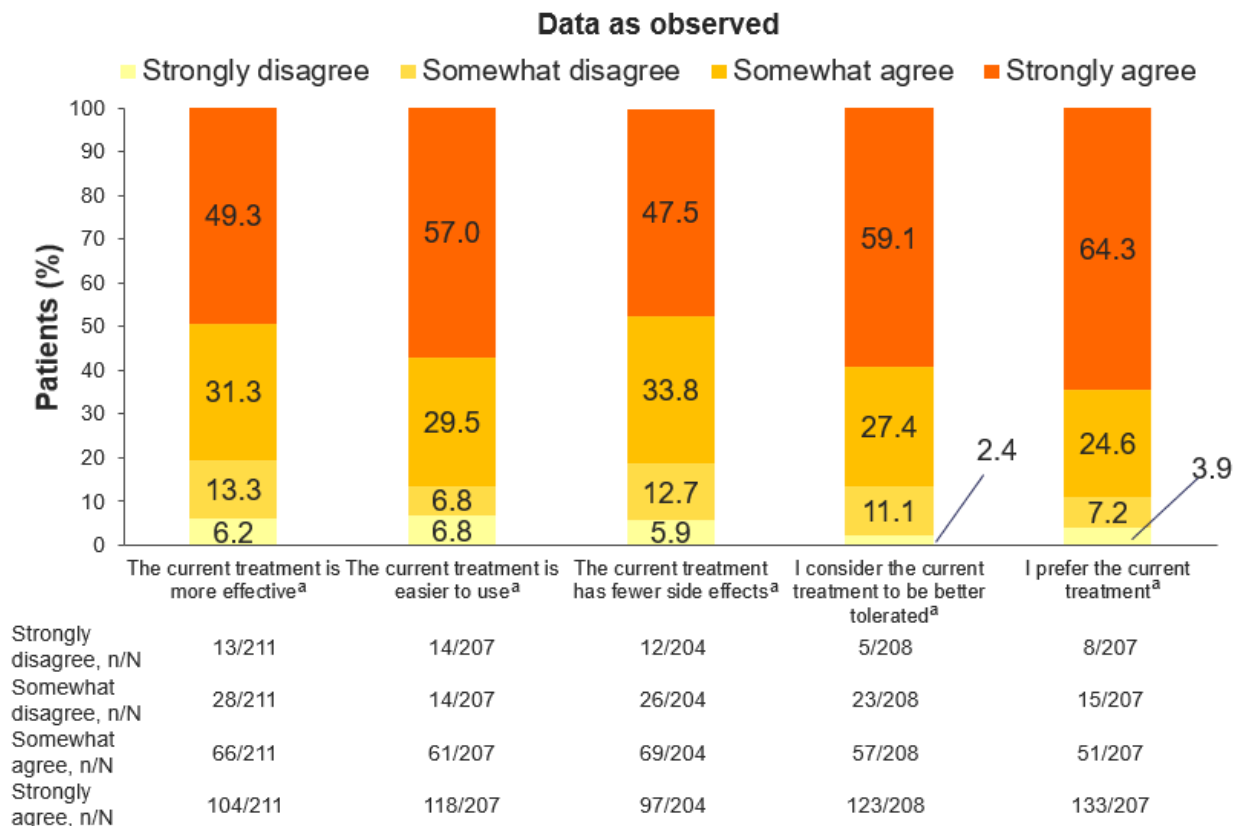

Data are from the full analysis population (N=257). Patients responded to the following statements: the current treatment is more effective than previous systemic treatments; the current treatment is easier to use than previous systemic treatments; the current treatment has fewer side effects than previous systemic treatments; I consider the current treatment to be better tolerated than previous systemic treatments; I prefer the current treatment to previous systemic treatments.

<sup>a</sup>Versus previous systemic treatments.

PPQ=Patient Therapy Preference Questionnaire.
